# Supplementary material for: Effects of treatment with corticosteroids on human rhinovirus-induced asthma exacerbations in pediatric inpatients: a prospective observational study
Source: PubMed Central journal article supplement (PMC10696820; doi:10.1186/s12890-023-02798-6), 2023-12-05
Supplement: 12890_2023_2798_MOESM1_ESM.pdf [file 12890_2023_2798_MOESM1_ESM.pdf]

Additional file 1. Comparison of characteristics, laboratory findings, clinical outcome, and the detection rates of viral pathogens between non-ICS group and ICS group

| Characteristics                                                  | Non-ICS group<br>n=26 | ICS group<br>n=28 | p value  |
|------------------------------------------------------------------|-----------------------|-------------------|----------|
| Age, years <sup>a</sup>                                          | 9.2±2.2               | 10.3±2.5          | 0.086    |
| Men                                                              | 17 (65.4%)            | 14 (50.0%)        | 0.25     |
| Treatment during a stable state, n (%)                           |                       |                   |          |
| LABA                                                             | 0 (0.0%)              | 22 (78.6%)        | < 0.001* |
| Symptom                                                          |                       |                   |          |
| Wheezes                                                          | 24 (92.3%)            | 22 (78.6%)        | 0.25     |
| Duration of URTI symptoms before consultation, days <sup>b</sup> | 4 (2–6)               | 3 (2–6)           | 0.83     |
| Body temperature, °C <sup>a</sup>                                | 37.3±0.6              | 37.3±1.0          | 1.00     |
| Laboratory findings                                              |                       |                   |          |
| CRP, mg/dL <sup>b</sup>                                          | 0.49 (0.29–1.20)      | 0.41 (0.04–0.99)  | 0.18     |
| WBC count, /μL <sup>a</sup>                                      | 9,337±2,588           | 7,603±2,700       | 0.02*    |
| Eosinophil count in bloods, /μL <sup>b</sup>                     | 66 (8–518)            | 312 (45–570)      | 0.14     |
| Eosinophil percentage in blood, % <sup>b</sup>                   | 0.8 (0.1–4.4)         | 3.6 (0.8–7.1)     | 0.07     |
| Total serum IgE, IU/mL <sup>b</sup>                              | 1,187 (742–1,891)     | 810 (435–1,746)   | 0.31     |
| Hospitalization duration, day <sup>b</sup>                       | 6 (5–8)               | 8 (7–8)           | 0.07     |
| Treatment with systemic corticosteroids, n (%)                   | 26 (100.0%)           | 27 (96.4%)        | 1.00     |
| Systemic steroid treatment duration, days <sup>b</sup>           | 5 (4–7)               | 5 (4–7)           | 0.83     |
| Viral pathogen detected                                          | 23 (88.5%)            | 22 (78.6%)        | 0.47     |
| HRV/enterovirus <sup>c</sup>                                     | 21 (80.8%)            | 15 (53.6%)        | 0.03     |
| HRV                                                              | 21 (80.8%)            | 12 (42.9%)        | 0.004*   |
| HRV-A                                                            | 9 (34.6%)             | 7 (25.0%)         | 0.44     |
| HRV-B                                                            | 0 (0.0%)              | 1 (3.6%)          | 1.00     |
| HRV-C                                                            | 12 (46.2%)            | 4 (14.3%)         | 0.01*    |
| non detected                                                     | 0 (0%)                | 2 (7.1%)          | 0.49     |
| enterovirus                                                      | 0 (0.0%)              | 1 (3.6%)          | 1.00     |
| Parainfluenza virus                                              | 2 (7.7%)              | 3 (10.7%)         | 1.00     |
| Respiratory syncytial virus                                      | 0 (0.0%)              | 3 (10.7%)         | 0.24     |
| Influenza A virus                                                | 1 (3.8%)              | 1 (3.6%)          | 1.00     |
| Human metapneumovirus                                            | 0 (0.0%)              | 1 (3.6%)          | 1.00     |
| Coronavirus                                                      | 0 (0.0%)              | 1 (3.6%)          | 1.00     |
| Adenovirus                                                       | 0 (0.0%)              | 1 (3.6%)          | 1.00     |

Data are the mean±standard deviation<sup>a</sup> and the median (interquartile range)<sup>b</sup>

<sup>c</sup>Detected by multiplex PCR. \*p < 0.05

Number of participants with missing data were as follow: 2 for CRP; 1 for WBC count and eosinophil count and percentage in blood, 8 for total serum IgE.

Abbreviations;PFT, pulmonary function test; ICS, inhaled corticosteroids; LABA, long-acting beta2-agonist; URTI, upper respiratory tract infection; CRP, C-reactive protein; WBC, white blood cell; IgE, immunoglobulin E; FVC, forced vital capacity; FEV1, forced expiratory volume in one second; HRV, human rhinovirus.
