# Supplementary material for: Effects of treatment with corticosteroids on human rhinovirus-induced asthma exacerbations in pediatric inpatients: a prospective observational study
Source: Springer Nature journal article supplement (doi:10.1186/s12890-023-02798-6), 2023-12-05
Supplement: MOESM2 [file 26495694]

Additional file 2. Comparison of characteristics, laboratory findings, and clinical outcome between non-PFT group and PFT group in HRV-positive hospitalized patients with systemic steroids treatment

| Characteristics                                                 | Non-PFT group<br>n=15 | PFT group<br>n=18 | p value  |
|-----------------------------------------------------------------|-----------------------|-------------------|----------|
| Age, years <sup>a</sup>                                         | 9.4±1.9               | 10.4±2.6          | 0.19     |
| Male, n (%)                                                     | 10 (66.7%)            | 11 (61.1%)        | 0.74     |
| Treatment during a stable state, n (%)                          |                       |                   |          |
| ICS                                                             | 0 (0.0%)              | 2 (11.1%)         | 0.49     |
| ICS/LABA                                                        | 0 (0.0%)              | 10 (55.6%)        | < 0.001* |
| Anti-IgE antibody                                               | 0 (0.0%)              | 1 (5.6%)          | 1.00     |
| Symptom                                                         |                       |                   |          |
| Wheezes, n (%)                                                  | 15 (100.0%)           | 14 (77.8%)        | 0.11     |
| Duration of URTI symptoms before consultation, day <sup>b</sup> | 3 (2–4)               | 4 (2–7)           | 0.74     |
| Body temperature, °C <sup>a</sup>                               | 37.2±0.5              | 37.3±0.9          | 0.56     |
| Laboratory findings                                             |                       |                   |          |
| CRP, mg/dL <sup>b</sup>                                         | 0.60 (0.34–1.30)      | 0.42 (0.15–1.04)  | 0.26     |
| WBC count, /μL <sup>a</sup>                                     | 9,373±2,341           | 8,549±2,667       | 0.35     |
| Eosinophil count in bloods, /μL <sup>b</sup>                    | 130 (8–592)           | 302 (68–507)      | 0.65     |
| Eosinophil percentage in blood, % <sup>b</sup>                  | 0.9 (0.1–6.2)         | 3.3 (1.2–6.4)     | 0.56     |
| Total serum IgE, IU/mL <sup>b</sup>                             | 1,351 (686–2354)      | 828 (516–1848)    | 0.28     |
| Baseline lung function (pre-bronchodilator)                     |                       |                   |          |
| FVC, L <sup>a</sup>                                             | -                     | 2.11±0.54         | -        |
| FEV1, L <sup>a</sup>                                            | -                     | 1.85±0.53         | -        |
| FEV1% predicted, % <sup>a</sup>                                 | -                     | 92.5±10.5         | -        |
| FEV1/FVC, % <sup>a</sup>                                        | -                     | 87.6±7.3          | -        |
| Types of human rhinovirus, n (%)                                |                       |                   |          |
| A                                                               | 5 (33.3%)             | 11 (61.1%)        | 0.11     |
| B                                                               | 0 (0.0%)              | 1 (5.6%)          | 1.00     |
| C                                                               | 10 (66.7%)            | 6 (33.3%)         | 0.06     |
| Hospitalization duration, days <sup>b</sup>                     | 6 (5–8)               | 7 (6–8)           | 0.19     |
| Systemic steroid treatment duration, days <sup>b</sup>          | 5 (4–7)               | 6 (4–7)           | 0.85     |

Data are the mean±standard deviation<sup>a</sup> and the median (interquartile range)<sup>b</sup>

Number of participants with missing data were as follows; 2 for Total serum IgE.

\*p < 0.05.

Abbreviations;PFT, pulmonary function test; ICS, inhaled corticosteroids; LABA, long-acting beta2-agonist; URTI, upper respiratory tract infection; CRP, C-reactive protein; WBC, white blood cell; IgE, immunoglobulin E; FVC, forced vital capacity; FEV1, forced expiratory volume in one second.
