# Supplementary material for: Effects of treatment with corticosteroids on human rhinovirus-induced asthma exacerbations in pediatric inpatients: a prospective observational study
Source: Springer Nature journal article supplement (doi:10.1186/s12890-023-02798-6), 2023-12-05
Supplement: MOESM3 [file 26495694]

Additional file 3. Baseline characteristics and laboratory findings by the treatment period of systemic steroids in HRV-positive hospitalized patients with followed-up PFT

| Characteristics                                                     | Overall<br>n=18  | Steroid treatment period |                  | p-value |
|---------------------------------------------------------------------|------------------|--------------------------|------------------|---------|
|                                                                     |                  | 3–5 days<br>n=8          | 6–8 days<br>n=10 |         |
| Age, years <sup>a</sup>                                             | 10.4±2.6         | 10.4±3.0                 | 10.5±2.4         | 0.92    |
| Men, n (%)                                                          | 11 (61.1%)       | 3 (37.5%)                | 8 (80.0%)        | 0.14    |
| Treatment during a stable state,<br>n (%)                           |                  |                          |                  |         |
| ICS                                                                 | 2 (11.1%)        | 1 (12.5%)                | 1 (10.0%)        | 1.00    |
| ICS/LABA                                                            | 10 (55.6%)       | 4 (50.0%)                | 6 (60.0%)        | 1.00    |
| Symptom                                                             |                  |                          |                  |         |
| Wheezes, n (%)                                                      | 14 (77.8%)       | 5 (62.5%)                | 9 (90.0%)        | 0.27    |
| Duration of URTI symptoms before<br>consultation, days <sup>b</sup> | 4 (2–7)          | 4 (2–6)                  | 4 (2–7)          | 0.96    |
| Body temperature, °C <sup>a</sup>                                   | 37.3±0.9         | 37.1±1.1                 | 37.4±0.7         | 0.54    |
| Laboratory findings                                                 |                  |                          |                  |         |
| CRP, mg/dL <sup>a</sup>                                             | 0.42 (0.15–1.04) | 0.28 (0.07–0.69)         | 0.74 (0.24–1.04) | 0.53    |
| WBC count, /μL <sup>a</sup>                                         | 8,549±2,667      | 8,492±2,892              | 8,594±2,632      | 0.94    |
| Eosinophil count in bloods, /μL <sup>b</sup>                        | 302 (68–507)     | 251 (54–455)             | 312 (93–684)     | 0.62    |
| Eosinophil percentage in blood, % <sup>b</sup>                      | 3.3 (1.2–6.4)    | 3.3 (0.9–4.7)            | 3.3 (1.4–8.9)    | 0.76    |
| Total serum IgE, IU/mL <sup>b</sup>                                 | 828 (516–1,848)  | 842 (321–1,544)          | 816 (575–1,913)  | 0.68    |
| Baseline lung function (pre-<br>bronchodilator)                     |                  |                          |                  |         |
| FVC, L <sup>a</sup>                                                 | 2.11±0.54        | 2.16±0.52                | 2.08±0.58        | 0.76    |
| FEV1, L <sup>a</sup>                                                | 1.85±0.53        | 1.96±0.55                | 1.77±0.52        | 0.45    |
| FEV1% predicted, % <sup>a</sup>                                     | 92.5±10.5        | 97.7±9.3                 | 88.2±9.8         | 0.053   |
| FEV1/FVC, % <sup>a</sup>                                            | 87.6±7.3         | 90.3±6.5                 | 85.3±7.4         | 0.15    |
| Hospitalization duration, days <sup>b</sup>                         | 7 (6–8)          | 6 (6–8)                  | 8 (7–9)          | 0.17    |
| Rhinovirus type, n (%)                                              |                  |                          |                  |         |
| A                                                                   | 11 (61.1%)       | 5 (62.5%)                | 6 (60.0%)        | 1.00    |
| B                                                                   | 1 (5.6%)         | 0 (0.0%)                 | 1 (10.0%)        | 1.00    |
| C                                                                   | 6 (33.3%)        | 3 (37.5%)                | 3 (30.0%)        | 1.00    |

Data are the mean±standard deviation<sup>a</sup> and the median (interquartile range)<sup>b</sup>

Statistical analysis was used with t-test or Mann-Whitney U test for continuous variables, and chi-squared test or Fisher's exact test for dichotomous variable between systemic steroid treatment duration for 3–5 or 6–8 days.

Two were missing for total serum IgE.

Abbreviations; PFT, pulmonary function test; ICS, inhaled corticosteroids; LABA, long-acting beta2-agonist; URTI, upper respiratory tract infection; CRP, C-reactive protein; WBC, white blood cell; IgE, immunoglobulin E; FVC, forced vital capacity; FEV1, forced expiratory volume in one second.
